# Supplementary material
Source: PubMed Central journal article supplement (PMC8487651)
Supplement: deab049_supplementary_table_s9.pdf [file deab049_supplementary_table_s9.pdf]

**Supplementary Table SIX** Adjusted sensitivity analysis: cervical mucus characteristics for women aged <35 and ≥35 years.<sup>a</sup>

|                                       | Age <35<br>501<br>2354      | Age ≥35<br>27<br>134 |
|---------------------------------------|-----------------------------|----------------------|
| <b>Number of women</b>                |                             |                      |
| <b>Number of cycles</b>               |                             |                      |
|                                       | <b>Mean (days) (95% CI)</b> |                      |
| <b>Cervical Mucus Characteristics</b> |                             |                      |
| Days of peak type mucus               | 7.7 (6.9, 8.6)              | 6.5 (4.9, 8.2)       |
| Days of non-peak type mucus           | 6.2 (5.1, 7.3)              | 5.1 (2.9, 7.3)       |
| Dry days                              | 16.5 (15.0, 18.0)           | 18.4 (15.4, 21.4)    |
| Mucus peak days                       | 2.3 (2.1, 2.5)              | 2.1 (1.7, 2.5)       |
| Cervical mucus cycle score            | 8.7 (8.0, 9.4)              | 7.3 (6.0, 8.6)*      |
| <b>Fertility characteristics</b>      |                             |                      |
| Potentially fertile days              | 14.4 (13.3, 15.5)           | 13.0 (10.9, 15.1)    |
| Non-fertile days                      | 14.8 (13.7, 16.0)           | 16.0 (13.8, 18.2)    |
|                                       | <b>Proportion (95% CI)</b>  |                      |
| Days of peak type mucus ≤2            | 12.0 (10.6, 13.4)           | 16.4 (10.0, 22.8)    |
| Days of non-peak type mucus ≤2        | 37.6 (35.5, 39.6)           | 44.5 (35.9, 53.1)    |
| Cervical mucus cycle score ≤5.0       | 20.3 (18.6, 21.9)           | 23.1 (16.0, 30.3)    |
| Potentially fertile days ≤9           | 33.4 (31.4, 35.4)           | 39.1 (30.6, 47.5)    |

<sup>a</sup>Adjusted for parity, partial breast feeding, and recent use of oral contraceptives.

\*0.01 &lt; P &lt; 0.05 for comparison between age groups.
